# Supplementary material
Source: PubMed Central journal article supplement (PMC9678835)
Supplement: mmc1.pdf [file mmc1.pdf]

**Supplementary materials – Table of Content**

**Figure 1 Study flowchart**..... 1

**Table 1 Pooled sex-and-age stratified incidence rates according to the provenance of the events** ..... 1

1. Autoimmune diseases..... 1
2. Circulatory system..... 3
3. Cardiovascular system..... 7
4. Respiratory system ..... 9
5. Nerves and central nervous system ..... 10
6. Skin and mucous membrane system..... 11
7. Hepato-gastrointestinal and renal system..... 12
8. Other system..... 13

**Figure 3 Percentage change in health care utilization in the pre- versus during the COVID-19 pandemic period (2017-2019 versus 2020)**..... 15

**Figure 1 Study flowchart**

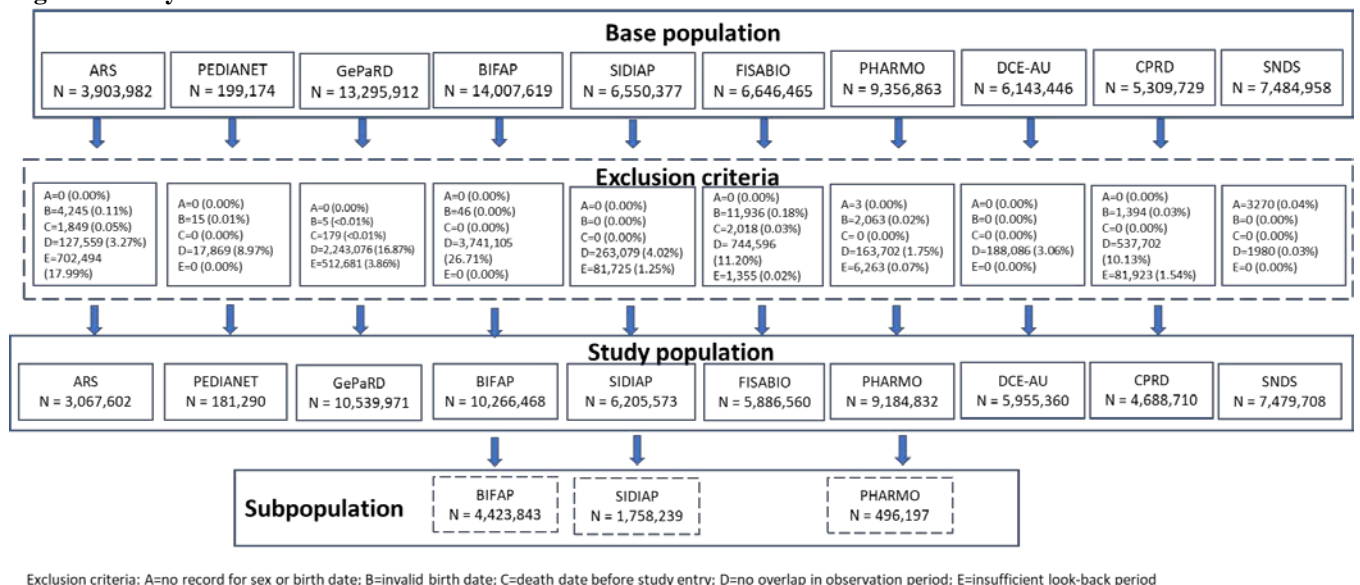

**Table 1 Pooled sex-and-age stratified incidence rates according to the provenance of the events**

Incidence rates for all AESIs, except anosmia-ageusia should rely on hospital databanks (GP and IN-OUTPATIENT databases). Incidence rates for anosmia-ageusia should rely on data generated using GPs databanks (GP only databases). Note: rates for acute aseptic arthritis were not available because no narrow clinical definition could be developed.

1. Autoimmune diseases

| AESIs                    | Age group | Female                | Male                   |
|--------------------------|-----------|-----------------------|------------------------|
| Guillain Barre Syndrome  | 0-19      | 1.20 (0.74-1.65)      | 1.54 (1.05-2.03)       |
|                          | 20-29     | 0.92 (0.34-1.50)      | 1.63 (0.90-2.37)       |
|                          | 30-39     | 1.51 (0.65-2.37)      | 2.11 (1.21-3.01)       |
|                          | 40-49     | 1.95 (1.28-2.62)      | 2.23 (1.30-3.16)       |
|                          | 50-59     | 2.60 (1.87-3.34)      | 4.85 (3.87-5.84)       |
|                          | 60-69     | 4.78 (2.18-7.38)      | 6.13 (3.50-8.66)       |
|                          | 70-79     | 6.12 (4.18-8.06)      | 11.07 (4.52-17.63)     |
|                          | 80+       | 3.64 (0.07-7.21)      | 8.29 (1.70-14.88)      |
|                          | Overall   | 2.46 (1.871-3.041)    | 3.77 (2.94 (4.60)      |
| ADEM                     | 0-19      | 0.71 (0.22-1.19)      | 0.80 (0.00-1.83)       |
|                          | 20-29     | 0.35 (0.00-0.76)      | 0.13 (0.00-0.43)       |
|                          | 30-39     | 0.23 (0.00-0.52)      | 0.11 (0.00-0.34)       |
|                          | 40-49     | 0.16 (0.00-0.39)      | 0.13 (0.00-0.42)       |
|                          | 50-59     | 0.11 (0.00-0.32)      | 0.23 (0.00-0.51)       |
|                          | 60-69     | 0.22 (0.00-0.53)      | 0.20 (0.00-0.50)       |
|                          | 70-79     | 0.28 (0.00-0.65)      | 0.19 (0.00-0.59)       |
|                          | 80+       | 0.06 (0.00-0.33)      | 0.08 (0.00-0.51)       |
|                          | Overall   | 0.21 (0.11-0.31)      | 0.21 (0.08-0.34)       |
| Narcolepsy               | 0-19      | 0.88 (0.22-1.49)      | 0.89 (0.39-1.38)       |
|                          | 20-29     | 1.99 (1.00-2.99)      | 1.80 (0.21-3.38)       |
|                          | 30-39     | 1.73 (1.09-2.37)      | 2.23 (1.51-2.94)       |
|                          | 40-49     | 2.07 (0.74-3.40)      | 2.66 (1.77-3.56)       |
|                          | 50-59     | 1.63 (0.29-2.98)      | 1.61 (0.76-2.46)       |
|                          | 60-69     | 1.52 (0.88-2.17)      | 1.38 (0.74-2.02)       |
|                          | 70-79     | 1.23 (0.56-1.89)      | 1.11 (0.00-2.42)       |
|                          | 80+       | 1.26 (0.56-1.96)      | 1.28 (0.35-2.21)       |
|                          | Overall   | 1.50 (1.18-1.82)      | 1.54 (1.18-1.90)       |
| Type 1 Diabetes Mellitus | 0-19      | 25.53 (22.46-28.60)   | 29.14 (26.26-32.01)    |
|                          | 20-29     | 25.18 (18.11-32.25)   | 30.82 (20.34-41.31)    |
|                          | 30-39     | 26.83 (14.57-39.08)   | 35.90 (19.99-51.82)    |
|                          | Overall   | 25.50 (21.20-29.80)   | 31.76 (26.54-36.97)    |
| Thrombocytopenia         | 0-19      | 23.93 (10.86-36.40)   | 26.85 (11.59-42.11)    |
|                          | 20-29     | 48.98 (19.39-78.58)   | 34.43 (13.21-55.64)    |
|                          | 30-39     | 70.61 (32.36-108.86)  | 41.16 (23.25-59.08)    |
|                          | 40-49     | 50.28 (21.19-79.37)   | 52.98 (25.72-80.24)    |
|                          | 50-59     | 68.78 (36.02-101.54)  | 103.57 (47.33-159.82)  |
|                          | 60-69     | 108.04 (60.26-155.83) | 192.73 (90.04-295.42)  |
|                          | 70-79     | 160.84 (81.57-240.10) | 312.17 (139.05-485.29) |

|  |         |                       |                        |
|--|---------|-----------------------|------------------------|
|  | 80+     | 315.15 (68.80-361.50) | 447.69 (167.23-728.14) |
|  | Overall | 92.40 (74.79-110.00)  | 147.17 (123.45-170.89) |

ADEM: Acute Disseminated Encephalomyelitis

2. Circulatory system

| AESIs                                  | Age group | Female                    | Male                      |
|----------------------------------------|-----------|---------------------------|---------------------------|
| Disseminated Intravascular Coagulation | 0-19      | 0.59 (0.00-1.25)          | 1.00 (0.00-2.28)          |
|                                        | 20-29     | 0.17 (0.00-0.51)          | 0.81 (0.09-1.54)          |
|                                        | 30-39     | 1.00 (0.50-1.51)          | 0.78 (0.00-1.82)          |
|                                        | 40-49     | 1.50 (0.08-2.92)          | 1.49 (0.00-3.50)          |
|                                        | 50-59     | 1.50 (0.00-3.82)          | 3.52 (0.00-7.77)          |
|                                        | 60-69     | 2.89 (0.00-6.39)          | 5.12 (0.00-12.05)         |
|                                        | 70-79     | 6.62 (0.00-13.61)         | 10.25 (0.00-22.99)        |
|                                        | 80+       | 7.98 (0.00-16.77)         | 11.93 (0.00-27.60)        |
|                                        | Overall   | 1.99 (1.39-2.60)          | 2.98 (2.23-3.73)          |
| Arterial without TP                    | 0-19      | 7.08 (2.36-11.80)         | 6.83 (1.86-11.80)         |
|                                        | 20-29     | 8.29 (6.73-9.85)          | 9.72 (6.72-12.71)         |
|                                        | 30-39     | 23.27 (18.09-28.46)       | 40.06 (33.77-46.35)       |
|                                        | 40-49     | 71.50 (52.55-90.45)       | 177.89 (140.22-215.57)    |
|                                        | 50-59     | 182.01 (133.17-230.84)    | 525.51 (418.99-632.02)    |
|                                        | 60-69     | 384.45 (276.80-492.11)    | 940.52 (669.50-1211.54)   |
|                                        | 70-79     | 847.71 (603.91-1091.53)   | 1570.60 (1109.83-2031.37) |
|                                        | 80+       | 1919.06 (1289.11-2549.01) | 2540.80 (1657.11-3424.50) |
|                                        | Overall   | 377.21 (347.95-406.48)    | 634.06 (597.68-670.44)    |
| Arterial with TP                       | 0-19      | 0.07 (0.00-0.23)          | 0.04 (0.00-0.17)          |
|                                        | 20-29     | 0.07 (0.00-0.34)          | 0.11 (0.00-0.41)          |
|                                        | 30-39     | 0.08 (0.00-0.30)          | 0.00 (0.00-0.15)          |
|                                        | 40-49     | 0.19 (0.00-0.43)          | 0.40 (0.00-0.94)          |
|                                        | 50-59     | 0.85 (0.00-1.82)          | 2.86 (0.00-6.13)          |
|                                        | 60-69     | 1.69 (0.00-4.13)          | 6.84 (0.00-15.82)         |
|                                        | 70-79     | 6.21 (0.00-13.33)         | 13.78 (0.00-32.57)        |
|                                        | 80+       | 9.11 (0.00-21.69)         | 32.22 (0.00-66.73)        |
|                                        | Overall   | 0.78 (0.42-1.14)          | 1.73 (1.20-2.25)          |
| VTE                                    | 0-19      | 8.42 (6.56-10.28)         | 9.26 (7.33-11.18)         |
|                                        | 20-29     | 52.71 (41.33-64.08)       | 31.58 (25.62-37.55)       |
|                                        | 30-39     | 114.50 (88.34-140.66)     | 67.67 (60.35-74.78)       |
|                                        | 40-49     | 163.18 (124.85-201.52)    | 138.64 (119.97-157.31)    |
|                                        | 50-59     | 218.50 (167.47-269.53)    | 256.36 (233.86-278.86)    |
|                                        | 60-69     | 375.08 (299.99-450.16)    | 417.74 (383.29-452.19)    |
|                                        | 70-79     | 691.70 (583.62-799.78)    | 600.21 (543.64-656.77)    |
|                                        | 80+       | 930.17 (821.18-1039.15)   | 785.79 (629.18-942.39)    |
|                                        | Overall   | 313.88 (277.73-350.04)    | 281.22 (249.93-312.52)    |

|                                             |         |                           |                        |
|---------------------------------------------|---------|---------------------------|------------------------|
| VTE without TP                              | 0-19    | 8.39 (6.49-10.29)         | 9.00 (7.26-10.74)      |
|                                             | 20-29   | 52.51 (40.95-64.08)       | 31.42 (25.48-37.35)    |
|                                             | 30-39   | 114.12 (87.85-140.40)     | 67.37 (60.04-74.71)    |
|                                             | 40-49   | 163.05 (124.04-202.07)    | 138.01 (119.25-156.77) |
|                                             | 50-59   | 217.25 (165.98-268.53)    | 254.61 (232.21-277.00) |
|                                             | 60-69   | 373.78 (298.60-448.95)    | 413.65 (380.99-446.30) |
|                                             | 70-79   | 690.07 (580.87-799.27)    | 595.15 (541.37-648.93) |
|                                             | 80+     | 926.42 (819.98-1032.87)   | 780.74 (627.85-933.63) |
|                                             | Overall | 312.73 (276.74-348.72)    | 279.11 (248.14-310.08) |
| VTE with TP                                 | 0-19    | 0.09 (0.00-0.27)          | 0.37 (0.00-0.87)       |
|                                             | 20-29   | 0.24 (0.00-0.61)          | 0.22 (0.00-0.57)       |
|                                             | 30-39   | 0.72 (0.00-1.71)          | 0.56 (0.00-1.30)       |
|                                             | 40-49   | 0.39 (0.00-1.07)          | 1.01 (0.00-2.33)       |
|                                             | 50-59   | 1.71 (0.29-3.65)          | 2.94 (0.00-6.85)       |
|                                             | 60-69   | 2.20 (0.29-4.12)          | 6.67 (0.00-13.41)      |
|                                             | 70-79   | 2.85 (0.00-7.00)          | 7.96 (0.00-17.70)      |
|                                             | 80+     | 5.50 (0.00-11.50)         | 7.83 (0.00-17.39)      |
|                                             | Overall | 1.03 (0.67-1.39)          | 1.89 (1.35-2.42)       |
| Mixed arterial/venous thrombosis without TP | 0-19    | 16.97 (10.71-23.22)       | 9.00 (7.26-10.74)      |
|                                             | 20-29   | 61.54 (48.14-74.93)       | 31.42 (25.48-37.35)    |
|                                             | 30-39   | 141.45 (112.33-170.56)    | 67.37 (60.04-74.71)    |
|                                             | 40-49   | 229.28 (193.63-264.94)    | 138.01 (119.25-156.77) |
|                                             | 50-59   | 385.20 (342.67-427.73)    | 254.61 (232.21-277.00) |
|                                             | 60-69   | 733.62 (665.56-801.68)    | 413.65 (380.99-446.30) |
|                                             | 70-79   | 1512.92 (1336.20-1689.65) | 595.15 (541.37-648.93) |
|                                             | 80+     | 2798.34 (2133.64-3463.03) | 780.74 (627.85-933.63) |
|                                             | Overall | 716.89 (647.92-785.86)    | 279.11 (248.14-310.08) |
| Mixed arterial/venous thrombosis with TP    | 0-19    | 0.19 (0.00-0.41)          | 0.37 (0.00-0.87)       |
|                                             | 20-29   | 0.29 (0.00-0.72)          | 0.22 (0.00-0.57)       |
|                                             | 30-39   | 0.79 (0.00-1.88)          | 0.56 (0.00-1.30)       |
|                                             | 40-49   | 0.54 (0.00-1.34)          | 1.01 (0.00-2.33)       |
|                                             | 50-59   | 2.49 (0.00-5.25)          | 2.94 (0.00-6.85)       |
|                                             | 60-69   | 3.53 (0.00-7.43)          | 6.67 (0.00-13.41)      |
|                                             | 70-79   | 9.07 (0.00-19.98)         | 7.96 (0.00-17.70)      |
|                                             | 80+     | 13.77 (0.00-31.22)        | 7.83 (0.00-17.39)      |
|                                             | Overall | 2.10 (1.49-2.71)          | 1.89 (1.35-2.42)       |
| CVST                                        | 0-19    | 0.56 (0.03-1.09)          | 0.60 (0.13-1.08)       |
|                                             | 20-29   | 0.61 (0.00-1.25)          | 0.46 (0.02-0.90)       |
|                                             | 30-39   | 0.41 (0.00-0.85)          | 0.51 (0.13-0.89)       |
|                                             | 40-49   | 0.97 (0.52-1.41)          | 0.55 (0.21-0.89)       |

|                            |         |                        |                        |
|----------------------------|---------|------------------------|------------------------|
|                            | 50-59   | 0.82 (0.39-1.25)       | 1.27 (0.74-1.79)       |
|                            | 60-69   | 0.97 (0.03-1.91)       | 1.15 (0.56-1.75)       |
|                            | 70-79   | 0.49 (0.04-0.94)       | 1.11 (0.00-2.38)       |
|                            | 80+     | 1.08 (0.07-2.10)       | 1.28 (0.35-2.21)       |
|                            | Overall | 0.67 (0.49-0.85)       | 0.68 (0.53-0.84)       |
| CVST without TP            | 0-19    | 0.56 (0.03-1.09)       | 0.52 (0.21-0.82)       |
|                            | 20-29   | 0.61 (0.00-1.25)       | 0.46 (0.02-0.90)       |
|                            | 30-39   | 0.41 (0.00-0.85)       | 0.51 (0.13-0.89)       |
|                            | 40-49   | 0.97 (0.52-1.41)       | 0.55 (0.21-0.89)       |
|                            | 50-59   | 0.82 (0.39-1.25)       | 1.23 (0.71-1.75)       |
|                            | 60-69   | 0.83 (0.00-1.70)       | 1.15 (0.56-1.75)       |
|                            | 70-79   | 0.38 (0.00-0.80)       | 1.07 (0.00-2.24)       |
|                            | 80+     | 0.99 (0.10-1.89)       | 1.19 (0.29-2.10)       |
|                            | Overall | 0.64 (0.46-0.81)       | 0.66 (0.51-0.82)       |
| CVST with TP               | 0-19    | 0.00 (0.00-0.12)       | 0.17 (0.00-0.41)       |
|                            | 20-29   | 0.00 (0.00-0.23)       | 0.00 (0.00-0.23)       |
|                            | 30-39   | 0.00 (0.00-0.17)       | 0.00 (0.00-0.17)       |
|                            | 40-49   | 0.00 (0.00-0.14)       | 0.00 (0.00-0.13)       |
|                            | 50-59   | 0.00 (0.00-0.16)       | 0.08 (0.00-0.30)       |
|                            | 60-69   | 0.13 (0.00-0.41)       | 0.00 (0.00-0.21)       |
|                            | 70-79   | 0.02 (0.00-0.25)       | 0.13 (0.00-0.53)       |
|                            | 80+     | 0.14 (0.00-0.58)       | 0.23 (0.00-0.94)       |
|                            | Overall | 0.01 (0.00-0.07)       | 0.03 (0.00-0.11)       |
| Thrombotic microangiopathy | 0-19    | 0.32 (0.00-0.66)       | 1.14 (0.00-2.32)       |
|                            | 20-29   | 0.99 (0.39-1.60)       | 1.04 (0.00-2.40)       |
|                            | 30-39   | 1.21 (0.66-1.76)       | 1.44 (0.00-3.03)       |
|                            | 40-49   | 1.50 (0.86-2.14)       | 1.99 (0.00-4.31)       |
|                            | 50-59   | 1.07 (0.21-1.93)       | 4.24 (0.00-9.21)       |
|                            | 60-69   | 1.57 (0.92-2.22)       | 6.03 (0.00-13.83)      |
|                            | 70-79   | 1.88 (1.09-2.66)       | 12.20 (0.00-26.76)     |
|                            | 80+     | 2.13 (0.81-3.45)       | 12.43 (0.00-30.26)     |
|                            | Overall | 1.18 (0.87-1.50)       | 3.80 (2.85-4.76)       |
| Hemorrhagic stroke         | 0-19    | 2.58 (0.48-4.69)       | 4.01 (0.73-7.29)       |
|                            | 20-29   | 2.37 (0.75-3.99)       | 3.97 (1.21-6.73)       |
|                            | 30-39   | 5.28 (3.31-7.24)       | 7.02 (3.27-10.78)      |
|                            | 40-49   | 11.17 (7.23-15.11)     | 17.39 (10.20-24.58)    |
|                            | 50-59   | 21.69 (12.03-33.35)    | 38.67 (23.15-54.19)    |
|                            | 60-69   | 39.15 (23.46-54.84)    | 74.20 (42.44-105.95)   |
|                            | 70-79   | 100.22 (66.08-134.36)  | 180.45 (118.98-523.36) |
|                            | 80+     | 239.51 (138.29-340.74) | 361.26 (199.56-523.36) |

|                 |         |                          |                           |
|-----------------|---------|--------------------------|---------------------------|
|                 | Overall | 43.65 (37.43-49.87)      | 69.60 (61.06-78.13)       |
| Ischemic stroke | 0-19    | 4.83 (2.46-7.19)         | 4.39 (1.71-7.07)          |
|                 | 20-29   | 6.48 (5.09-7.87)         | 4.61 (2.26-6.87)          |
|                 | 30-39   | 15.75 (10.97-20.53)      | 16.73 (13.27-20.19)       |
|                 | 40-49   | 45.28 (31.00-59.55)      | 64.12 (47.13-81.11)       |
|                 | 50-59   | 109.96 (71.64-148.27)    | 207.99 (148.35-267.62)    |
|                 | 60-69   | 238.87 (165.25-312.50)   | 441.75 (294.49-589.00)    |
|                 | 70-79   | 580.62 (408.91-752.32)   | 893.76 (622.30-1165.22)   |
|                 | 80+     | 1445.03 (963.33-1926.73) | 1663.21 (1087.73-2238.47) |
|                 | Overall | 266.03 (244.12-287.94)   | 342.28 (1087.73-2238.69)  |
| SOCV            | 0-19    | 22.87 (9.38-36.36)       | 19.90 (8.07-31.73)        |
|                 | 20-29   | 8.00 (0.74-15.26)        | 3.93 (0.00-8.70)          |
|                 | 30-39   | 8.30 (0.19-16.40)        | 4.58 (0.00-9.76)          |
|                 | 40-49   | 9.28 (0.70-17.86)        | 7.25 (1.38-13.12)         |
|                 | 50-59   | 15.24 (1.25-29.24)       | 11.51 (1.15-21.88)        |
|                 | 60-69   | 19.51 (1.57-37.44)       | 13.77 (0.00-27.76)        |
|                 | 70-79   | 24.97 (1.51-48.43)       | 21.93 (2.05-41.81)        |
|                 | 80+     | 25.57 (0.00-52.76)       | 26.26 (0.00-53.94)        |
|                 | Overall | 16.47 (12.16-20.77)      | 13.26 (10.01-16.51)       |

CVST: Cerebral Venous Sinus Thrombosis; TP: Thrombocytopenia; VTE: Venous Thromboembolism

### 3. Cardiovascular system

| AESIs                 | Age group | Female                    | Male                      |
|-----------------------|-----------|---------------------------|---------------------------|
| Microangiopathy       | 0-19      | 0.52 (0.00-1.19)          | 1.14 (0.00-2.32)          |
|                       | 20-29     | 0.84 (0.00-1.87)          | 1.04 (0.00-2.40)          |
|                       | 30-39     | 1.70 (0.14-3.26)          | 1.44 (0.00-3.03)          |
|                       | 40-49     | 2.94 (0.49-5.39)          | 1.99 (0.00-4.31)          |
|                       | 50-59     | 2.49 (0.00-5.37)          | 4.24 (0.00-9.21)          |
|                       | 60-69     | 3.85 (0.00-8.03)          | 6.03 (0.00-13.83)         |
|                       | 70-79     | 8.18 (0.04-16.31)         | 12.20 (0.00-26.76)        |
|                       | 80+       | 9.64 (0.00-21.37)         | 12.43 (0.00-30.26)        |
|                       | Overall   | 2.94 (2.13-3.76)          | 3.80 (2.85-4.76)          |
| Heart Failure         | 0-19      | 2.93 (0.85-5.01)          | 2.96 (0.74-5.18)          |
|                       | 20-29     | 3.16 (0.05-6.27)          | 4.93 (3.31-6.54)          |
|                       | 30-39     | 10.14 (4.79-15.48)        | 15.60 (7.252-23.94)       |
|                       | 40-49     | 26.97 (14.48-39.49)       | 57.00 (32.63-81.34)       |
|                       | 50-59     | 94.96 (57.04-132.87)      | 195.14 (108.03-282.26)    |
|                       | 60-69     | 318.22 (204.15-432.28)    | 544.72 (334.13-755.31)    |
|                       | 70-79     | 1003.47 (667.84-1339.10)  | 1436.01 (963.51-1908.52)  |
|                       | 80+       | 3725.21 (2347.51-5102.91) | 4191.25 (2845.65-5536.85) |
|                       | Overall   | 494.23 (471.12-517.33)    | 579.16 (553.14-605.19)    |
| Stress Cardiomyopathy | 0-19      | 0.04 (0.00-0.18)          | 0.04 (0.00-0.17)          |
|                       | 20-29     | 0.00 (0.00-0.21)          | 0.00 (0.00-0.20)          |
|                       | 30-39     | 0.16 (0.00-0.42)          | 0.09 (0.00-0.31)          |
|                       | 40-49     | 1.53 (0.76-2.29)          | 0.15 (0.00-0.48)          |
|                       | 50-59     | 4.51 (2.03-6.99)          | 1.32 (0.21-2.25)          |
|                       | 60-69     | 8.62 (4.85-12.38)         | 1.95 (0.00-4.16)          |
|                       | 70-79     | 15.18 (6.80-23.56)        | 4.80 (0.33-9.27)          |
|                       | 80+       | 16.62 (3.29-29.94)        | 6.69 (0.91-12.48)         |
|                       | Overall   | 3.29 (2.62-3.96)          | 0.56 (0.29-0.82)          |



|                             |         |                           |                           |
|-----------------------------|---------|---------------------------|---------------------------|
| Coronary Artery Disease     | 0-19    | 2.02 (0.00-4.05)          | 2.12 (0.25-3.98)          |
|                             | 20-29   | 1.61 (0.72-2.50)          | 4.49 (2.00-6.99)          |
|                             | 30-39   | 7.56 (5.13-9.99)          | 23.12 (20.24-26.00)       |
|                             | 40-49   | 23.50 (18.08-28.92)       | 112.72 (89.80-135.65)     |
|                             | 50-59   | 70.52 (55.64-85.40)       | 322.24 (265.10-379.38)    |
|                             | 60-69   | 149.66 (108.94-190.39)    | 517.54 (370.30-664.79)    |
|                             | 70-79   | 280.98 (192.72-369.24)    | 709.67 (480.70-938.63)    |
|                             | 80+     | 511.29 (326.26-696.31)    | 938.67 (572.51-1304.82)   |
|                             | Overall | 94.78 (86.70-102.86)      | 256.24 (209.26-269.08)    |
| Myocarditis                 | 0-19    | 0.54 (0.00-1.11)          | 2.24 (1.10-3.39)          |
|                             | 20-29   | 1.16 (0.53-1.79)          | 9.48 (6.05-12.91)         |
|                             | 30-39   | 1.46 (0.59-2.34)          | 6.04 (3.32-8.76)          |
|                             | 40-49   | 1.16 (0.37-1.94)          | 4.16 (2.03-6.29)          |
|                             | 50-59   | 1.98 (0.69-3.26)          | 3.23 (0.90-5.56)          |
|                             | 60-69   | 2.59 (1.07-4.11)          | 5.26 (1.71-8.81)          |
|                             | 70-79   | 2.95 (1.35-4.55)          | 5.06 (1.14-8.97)          |
|                             | 80+     | 1.99 (0.00-4.38)          | 2.80 (0.00-5.93)          |
|                             | Overall | 1.59 (1.18-2.01)          | 4.49 (3.56-5.43)          |
| Myocarditis or Pericarditis | 0-19    | 1.88 (1.16-2.61)          | 11.20 (4.78-17.63)        |
|                             | 20-29   | 5.60 (4.30-6.90)          | 39.05 (18.21-59.90)       |
|                             | 30-39   | 9.15 (3.27-15.03)         | 33.54 (15.58-51.50)       |
|                             | 40-49   | 10.07 (4.94-15.20)        | 28.72 (15.31-42.14)       |
|                             | 50-59   | 14.39 (8.23-20.54)        | 29.13 (18.93-39.33)       |
|                             | 60-69   | 17.16 (10.92-23.40)       | 36.87 (24.96-48.78)       |
|                             | 70-79   | 22.50 (13.26-31.75)       | 40.17 (24.82-55.53)       |
|                             | 80+     | 22.80 (11.55-34.05)       | 4.34 (22.19-60.48)        |
|                             | Overall | 11.87 (9.84-13.91)        | 31.44 (26.98-35.89)       |
| Arrhythmia                  | 0-19    | 183.82 (145.87-221.76)    | 178.01 (146.12-209.90)    |
|                             | 20-29   | 451.35 (338.88-563.83)    | 342.74 (285.77-399.72)    |
|                             | 30-39   | 466.71 (371.31-562.12)    | 356.05 (305.15-406.95)    |
|                             | 40-49   | 556.99 (451.07-662.90)    | 504.62 (426.96-582.28)    |
|                             | 50-59   | 814.11 (645.05-983.17)    | 931.89 (756.70-1107.09)   |
|                             | 60-69   | 1413.36 (1118.46-3426.96) | 2052.72 (1553.12-2552.33) |
|                             | 70-79   | 2777.08 (2127.20-3426.96) | 4144.27 (3044.16-5244.38) |
|                             | 80+     | 5346.36 (3324.70-7368.01) | 7349.09 (1744.53-2131.65) |
|                             | Overall | 1490.59 (1308.53-1672.65) | 1938.09 (1744.53-2131.65) |

#### 4. Respiratory system

| AESIs                               | Age group | Female                | Male                   |
|-------------------------------------|-----------|-----------------------|------------------------|
| Acute Respiratory Distress Syndrome | 0-19      | 17.10 (5.85-28.35)    | 18.67 (8.44-28.90)     |
|                                     | 20-29     | 4.67 (2.21-7.14)      | 7.68 (5.93-9.43)       |
|                                     | 30-39     | 7.12 (1.64-12.59)     | 10.33 (6.91-13.75)     |
|                                     | 40-49     | 12.26 (4.41-20.10)    | 18.32 (7.60-29.05)     |
|                                     | 50-59     | 32.69 (10.09-55.30)   | 45.83 (14.62-77.04)    |
|                                     | 60-69     | 70.69 (25.83-115.54)  | 106.44 (30.87-182.01)  |
|                                     | 70-79     | 127.54 (32.63-222.44) | 227.31 (54.23-400.40)  |
|                                     | 80+       | 467.15 (82.40-851.90) | 555.06 (110.65-999.47) |
|                                     | Overall   | 87.88 (73.77-101.99)  | 114.67 (98.83-130.51)  |

## 5. Nerves and central nervous system

| AESIs                  | Age group | Female                 | Male                   |
|------------------------|-----------|------------------------|------------------------|
| Generalized Convulsion | 0-19      | 209.71 (127.03-292.40) | 239.80 (142.18-337.43) |
|                        | 20-29     | 85.05 (35.60-134.51)   | 90.08 (43.14-137.01)   |
|                        | 30-39     | 77.72 (34.73-120.71)   | 85.76 (40.83-130.69)   |
|                        | 40-49     | 80.00 (36.32-123.68)   | 98.20 (49.56-146.68)   |
|                        | 50-59     | 99.94 (49.19-150.69)   | 136.42 (69.41-203.43)  |
|                        | 60-69     | 116.31 (52.68-179.93)  | 166.43 (73.89-258.97)  |
|                        | 70-79     | 182.96 (89.66-276.26)  | 245.41 (109.51-381.31) |
|                        | 80+       | 324.55 (126.69-522.42) | 367.48 (114.66-620.29) |
|                        | Overall   | 146.27 (119.18-173.36) | 177.72 (146.67-208.77) |
| Meningoencephalitis    | 0-19      | 3.33 (1.57-5.09)       | 4.13 (1.48-6.77)       |
|                        | 20-29     | 4.83 (3.62-6.04)       | 3.30 (2.29-4.31)       |
|                        | 30-39     | 4.31 (0.86-7.76)       | 4.62 (2.12-7.13)       |
|                        | 40-49     | 4.90 (1.25-8.55)       | 4.70 (2.54-6.86)       |
|                        | 50-59     | 7.17 (4.98-9.36)       | 8.24 (4.77-11.70)      |
|                        | 60-69     | 9.19 (2.83-15.56)      | 13.63 (9.64-17.61)     |
|                        | 70-79     | 16.72 (7.49-25.95)     | 16.09 (8.73-23.45)     |
|                        | 80+       | 17.32 (4.54-30.11)     | 16.06 (8.04-24.09)     |
|                        | Overall   | 7.98 (6.16-9.80)       | 8.12 (6.45-9.79)       |
| Transverse Myelitis    | 0-19      | 0.19 (0.00-0.41)       | 0.08 (0.00-0.24)       |
|                        | 20-29     | 0.50 (0.05-0.96)       | 0.21 (0.00-0.54)       |
|                        | 30-39     | 0.76 (0.22-1.29)       | 0.45 (0.09-0.82)       |
|                        | 40-49     | 0.92 (0.25-1.60)       | 0.39 (0.09-0.68)       |
|                        | 50-59     | 0.49 (0.01-0.96)       | 0.32 (0.00-0.81)       |
|                        | 60-69     | 0.64 (0.20-1.08)       | 0.67 (0.00-1.40)       |
|                        | 70-79     | 0.35 (0.00-0.87)       | 0.18 (0.00-0.55)       |
|                        | 80+       | 0.34 (0.00-0.75)       | 0.37 (0.00-1.22)       |
|                        | Overall   | 0.42 (0.29-0.55)       | 0.22 (0.11-0.33)       |

## 6. Skin and mucous membrane system

| AESIs                  | Age group | Female              | Male                |
|------------------------|-----------|---------------------|---------------------|
| Chilblain like lesions | 0-19      | 23.09 (4.29-41.88)  | 12.39 (0.86-23.92)  |
|                        | 20-29     | 43.46 (2.84-84.09)  | 15.81 (3.20-28.42)  |
|                        | 30-39     | 31.74 (1.78-61.69)  | 10.54 (1.46-19.63)  |
|                        | 40-49     | 31.20 (0.92-61.47)  | 11.07 (1.65-20.49)  |
|                        | 50-59     | 20.59 (1.51-39.67)  | 14.64 (2.39-26.88)  |
|                        | 60-69     | 21.30 (2.26-40.35)  | 14.60 (2.69-26.52)  |
|                        | 70-79     | 35.90 (3.86-67.94)  | 22.99 (5.37-40.61)  |
|                        | 80+       | 42.08 (3.62-80.54)  | 34.03 (6.65-61.41)  |
|                        | Overall   | 31.12 (22.59-39.64) | 16.76 (12.68-20.85) |
| Erythema multiforme    | 0-19      | 16.72 (4.50-28.95)  | 20.04 (9.89-30.20)  |
|                        | 20-29     | 6.53 (3.27-9.80)    | 5.48 (2.72-8.17)    |
|                        | 30-39     | 7.01 (3.07-10.96)   | 4.45 (1.57-7.33)    |
|                        | 40-49     | 6.61 (3.23-9.99)    | 3.93 (1.40-6.46)    |
|                        | 50-59     | 6.10 (2.18-10.12)   | 5.55 (1.67-9.42)    |
|                        | 60-69     | 6.63 (1.06-12.21)   | 4.95 (0.99-8.91)    |
|                        | 70-79     | 7.69 (2.32-13.06)   | 7.58 (3.56-11.60)   |
|                        | 80+       | 6.96 (0.00-14.48)   | 11.97 (4.95-18.98)  |
|                        | Overall   | 7.89 (5.92-9.86)    | 7.68 (5.65-9.72)    |

## 7. Hepato-gastrointestinal and renal system

| AESIs              | Age group | Female               | Male                  |
|--------------------|-----------|----------------------|-----------------------|
| Acute Liver Injury | 0-19      | 7.80 (4.99-10.61)    | 5.26 (2.48-8.04)      |
|                    | 20-29     | 11.97 (8.30-15.63)   | 16.48 (11.72-21.23)   |
|                    | 30-39     | 14.49 (11.32-17.67)  | 19.80 (17.77-21.82)   |
|                    | 40-49     | 21.85 (15.31-28.40)  | 32.34 (23.37-41.32)   |
|                    | 50-59     | 37.94 (26.74-49.15)  | 60.84 (30.70-90.98)   |
|                    | 60-69     | 43.89 (27.36-60.42)  | 86.00 (41.10-130.89)  |
|                    | 70-79     | 58.82 (30.40-87.23)  | 101.29 (40.27-162.30) |
|                    | 80+       | 56.74 (11.02-102.27) | 88.68 (18.45-158.90)  |
|                    | Overall   | 31.58 (26.04-37.12)  | 50.21 (41.29-59.13)   |

|                     |         |                          |                           |
|---------------------|---------|--------------------------|---------------------------|
| Acute Kidney Injury | 0-19    | 37.12 (18.81-55.43)      | 23.76 (11.13-36.38)       |
|                     | 20-29   | 67.92 (25.96-109.88)     | 33.93 (15.30-52.56)       |
|                     | 30-39   | 67.07 (27.03-107.11)     | 53.97 (21.03-86.92)       |
|                     | 40-49   | 92.45 (33.81-151.09)     | 105.08 (36.50-173.66)     |
|                     | 50-59   | 187.61 (73.95-301.27)    | 306.43 (101.47-511.40)    |
|                     | 60-69   | 487.78 (183.23-792.33)   | 871.63 (291.63-1451.63)   |
|                     | 70-79   | 1354.54 (490.20-2218.88) | 2162.32 (686.31-3638.32)  |
|                     | 80+     | 3733.87 (744.63-6723.11) | 4860.15 (1001.93-8718.36) |
|                     | Overall | 699.55 (643.13-755.98)   | 926.44 (866.29-986.58)    |

8. Other system

| AESIs                             | Age group | Female                    | Male                       |
|-----------------------------------|-----------|---------------------------|----------------------------|
| Anosmia, Ageusia                  | 0-19      | 2.35 (1.00-3.70)          | 1.79 (0.74-2.85)           |
|                                   | 20-29     | 9.02 (4.73-13.32)         | 6.30 (3.42-9.19)           |
|                                   | 30-39     | 15.02 (8.34-21.71)        | 10.92 (5.36-16.47)         |
|                                   | 40-49     | 22.12 (12.71-31.54)       | 16.68 (9.62-23.73)         |
|                                   | 50-59     | 37.41 (23.59-51.23)       | 22.62 (11.63-33.62)        |
|                                   | 60-69     | 40.34 (25.20-55.49)       | 27.66 (12.66-42.66)        |
|                                   | 70-79     | 39.15 (19.56-58.75)       | 22.46 (12.50-32.43)        |
|                                   | 80+       | 18.60 (8.72-28.49)        | 15.60 (8.08-23.12)         |
|                                   | Overall   | 21.96 (17.82-26.11)       | 14.72 (11.95-17.50)        |
| Anaphylaxis                       | 0-19      | 17.26 (10.05-24.48)       | 25.16 (13.11-37.21)        |
|                                   | 20-29     | 13.26 (2.65-23.80)        | 11.16 (4.49-17.83)         |
|                                   | 30-39     | 11.99 (2.88-21.10)        | 7.93 (2.37-13.49)          |
|                                   | 40-49     | 13.56 (4.99-22.14)        | 12.61 (7.14-18.09)         |
|                                   | 50-59     | 13.92 (6.48-21.37)        | 12.64 (8.58-16.71)         |
|                                   | 60-69     | 13.47 (6.74-20.20)        | 15.57 (13.03-18.12)        |
|                                   | 70-79     | 11.21 (4.91-17.33)        | 12.90 (8.71-17.10)         |
|                                   | 80+       | 7.84 (3.27-12.42)         | 8.80 (5.26-12.35)          |
|                                   | Overall   | 12.96 (10.43-15.50)       | 13.31 (10.73-15.89)        |
| Multisystem Inflammatory Syndrome | 0-19      | 3.08 (0.69-5.46)          | 5.23 (2.69-7.76)           |
|                                   | 20-29     | 0.51 (0.04-0.98)          | 0.39 (0.00-1.12)           |
|                                   | 30-39     | 0.34 (0.00-0.97)          | 0.31 (0.00-0.90)           |
|                                   | 40-49     | 0.28 (0.00-0.80)          | 0.27 (0.00-0.77)           |
|                                   | 50-59     | 0.30 (0.00-0.68)          | 0.36 (0.00-1.02)           |
|                                   | 60-69     | 0.21 (0.00-0.61)          | 0.26 (0.00-0.77)           |
|                                   | 70-79     | 0.21 (0.00-0.62)          | 0.60 (0.00-1.72)           |
|                                   | 80+       | 0.78 (0.00-2.11)          | 1.43 (0.00-3.81)           |
|                                   | Overall   | 0.56 (0.29-84)            | 0.83 (0.46-1.19)           |
| Death (any causes)                | 0-19      | 10.24 (6.77-13.71)        | 15.19 (9.98-20.40)         |
|                                   | 20-29     | 14.49 (10.30-18.67)       | 31.33 (27.46-35.20)        |
|                                   | 30-39     | 31.02 (27.00-35.05)       | 52.61 (43.53-61.69)        |
|                                   | 40-49     | 81.08 (73.26-88.90)       | 139.37 (120.22-158.52)     |
|                                   | 50-59     | 219.76 (196.62-242.90)    | 453.43 (391.82-515.05)     |
|                                   | 60-69     | 453.84 (417.02-490.66)    | 1088.14 (970.08-1206.21)   |
|                                   | 70-79     | 1167.28 (1081.25-1253.31) | 2481.12 (2250.09-2712.16)  |
|                                   | 80+       | 7664.66 (6629.84-8699.49) | 9398.47 (1526.20-10000.00) |
|                                   | Overall   | 1147.16 (1074.96-1219.35) | 1619.47 (1526.20-1712.74)  |
| Sudden death                      | 0-19      | 2.38 (0.08-4.68)          | 1.69 (0.00-3.56)           |
|                                   | 20-29     | 2.22 (0.00-4.90)          | 1.40 (0.00-3.13)           |
|                                   | 30-39     | 2.34 (0.11-4.57)          | 3.32 (0.08-6.56)           |

|  |         |                         |                          |
|--|---------|-------------------------|--------------------------|
|  | 40-49   | 5.23 (0.94-9.52)        | 7.17 (1.21-13.22)        |
|  | 50-59   | 14.78 (4.28-25.28)      | 30.07 (11.96-48.19)      |
|  | 60-69   | 31.09 (10.38-51.80)     | 83.98 (37.66-130.30)     |
|  | 70-79   | 94.12 (38.98-149.26)    | 193.75 (86.57-300.93)    |
|  | 80+     | 936.56 (443.10-1430.02) | 1004.02 (477.93-1530.11) |
|  | Overall | 27.43 (23.97-30.88)     | 30.29 (26.84-33.75)      |

**Figure 3 Percentage change in health care utilization in the pre- versus during the COVID-19 pandemic period (2017-2019 versus 2020)**

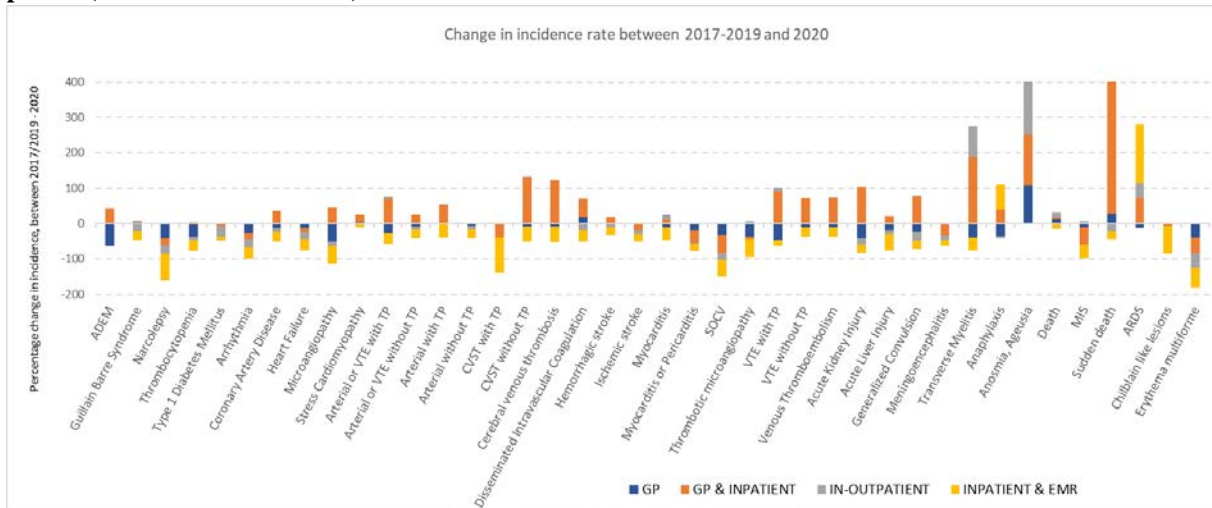

Only databases with data in 2020 were included. ADEM: Acute Disseminated Encephalomyelitis, ARDS: Acute Respiratory Distress Syndrome, CVST: Cerebral Venous Sinus Thrombosis, DIC: Disseminated Intravascular Coagulation, MIS: Multisystem Inflammatory Syndrome, SOCV: Single Organ Cutaneous Vasculitis, TP: Thrombocytopenia, VTE: Venous Thromboembolism. No data for acute aseptic arthritis because no narrow clinical definition could be developed.
